# Supplementary material for: Educational Leadership Flaws During the COVID-19 Pandemic: Implications for Online Learning in the 21st Century
Source: Research Square preprint supplement (doi:10.21203/rs.3.rs-5932755/v1), 2025-05-06
Supplement: Supplementary file 1 [file 9c898300c38b6f435c88dace.docx]

**Educational Leadership Flaws During the COVID-19 Pandemic: Implications for Online Learning in the 21st Century**

1. Moses Kumi Asamoah (Lead and Corresponding author)

University of Ghana, Legon

P.O Box LG25, Legon, Ghana

Country: Ghana, West Africa, Africa

**Email**: [mkasamoah@ug.edu.gh](mailto:mkasamoah@ug.edu.gh); [12345moseskumi@gmail.com](mailto:12345moseskumi@gmail.com)

**Cell Phone**: 23324635226

**Orcid**:0000-0002-6698-7528

1. Boadi Agyekum

University of Ghana, Legon

P.O Box LG25, Legon, Ghana

Country: Ghana, West Africa, Africa

**Email**: [bagyekum@ug.edu.gh](mailto:bagyekum@ug.edu.gh)

**Orcid**: 0000-0003-2602-1718

1. Ama Otwiwah Adu-Marfo

University of Ghana, Legon

P.O Box LG25, Legon, Ghana

Country: Ghana, West Africa, Africa

Email: aoadu-marfo@ug.edu.gh

1. Samuel Nuamah Eshun

University of Ghana, Legon

P.O Box LG25, Legon, Ghana

Country: Ghana, West Africa, Africa

Email: sneshun@ug.edu.gh

**Declaration**

1. Authors declare there is no conflict of interest.
2. There is no funding support from any funding agency.
3. This manuscript does not report data generation or analysis.
4. **Ethics**

All methods were carried out in accordance with relevant guidelines and regulations**.**

1. **Author contributions**

1. MKA made substantial contributions to the conception of the paper, design of the work; analysis and interpretation of data, writing and editing of the whole paper.

2. BA contributed to writing and editing of the paper.

3. AOA contributed to writing and editing of the paper.

4. SNE contributed to writing and editing of the paper.

All authors agreed to be accountable for all aspects of the work in ensuring that questions related to the accuracy or integrity of any part of the work are appropriately investigated and resolved.
